# Supplementary material for: Two-dimensional metal–organic framework Mo3(C2O)12 as a promising single-atom catalyst for selective nitrogen-to-ammonia conversion
Source: Royal Society of Chemistry journal article supplement (doi:10.1039/d1ta07613b), 2022-01-01
Supplement: d1ta07613b1.pdf [file d1ta07613b1.pdf]

## Electronic Supplementary Information

### **Two-dimensional metal-organic frameworks $\text{Mo}_3(\text{C}_2\text{O})_{12}$ as promising single-atom catalysts for selective nitrogen-to-ammonia**

Zhen Feng,<sup>\*a, b</sup> Zelin Yang,<sup>a</sup> Xiaowen Meng,<sup>a</sup> Fachuang Li,<sup>a</sup> Zhanyong Guo,<sup>a</sup> Shu Zheng,<sup>a</sup> Guang Su,<sup>a</sup> Yaqiang Ma,<sup>b</sup> †Yanan Tang,<sup>\*c</sup> and Xianqi Dai <sup>\*b</sup>

---

<sup>a</sup> School of Materials Science and Engineering, Henan Institute of Technology, Xinxiang, Henan 453000, China. E-mail: fengzhen27@126.com.

<sup>b</sup> School of Physics, Henan Normal University, Xinxiang, Henan 453007, China. E-mail: xqdai@htu.edu.cn.

<sup>c</sup> College of Physics and Electronic Engineering, Zhengzhou Normal University, Zhengzhou 450044, China. E-mail: yntang2010@163.com.

†Electronic Supplementary Information (ESI) available: See DOI:10.1039/ x0xx00000x

## Note S1 Electrochemical reaction computations

The free-energy change ( $\Delta G$ ) for each fundamental step was evaluated by computing  $\Delta G = \Delta E + \Delta E_{ZPE} - T\Delta S + \Delta G_U + \Delta G_{pH} + \Delta G_{field}$ <sup>1</sup>, where  $\Delta E$  is the electronic energy difference,  $\Delta E_{ZPE}$  is the zero-point energy (ZPE),  $T$  is 298.15 K, and  $\Delta S$  is the difference in entropy.  $\Delta G_U = eU$ , where  $U$  is the electrode potential, and  $e$  is the electron transfer.  $\Delta G_{pH} = k_B T \times \ln 10 \times pH$ , where  $k_B$  is the Boltzmann constant, and  $pH=0$  in this study.  $\Delta G_{field}$  is neglected. The entropies and vibrational frequencies of the gas species are taken from the NIST database<sup>2</sup>. The calculated  $\Delta E_{ZPE}$  and  $T\Delta S$  of free molecules and reaction intermediates are summarized in **Table S1**.

## Supplementary Figures

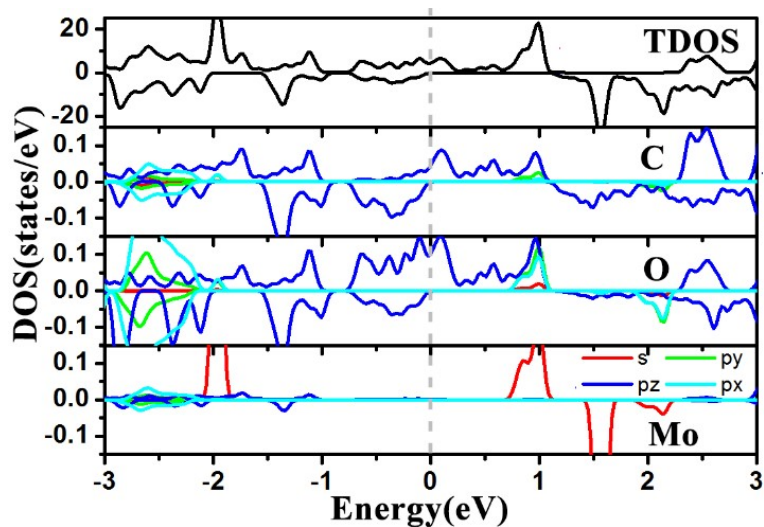

**Fig. S1.** TDOS of Mo-O MOF and PDOS of C, O, Mo element in Mo-O MOF monolayer. The Fermi level is set to 0 eV.

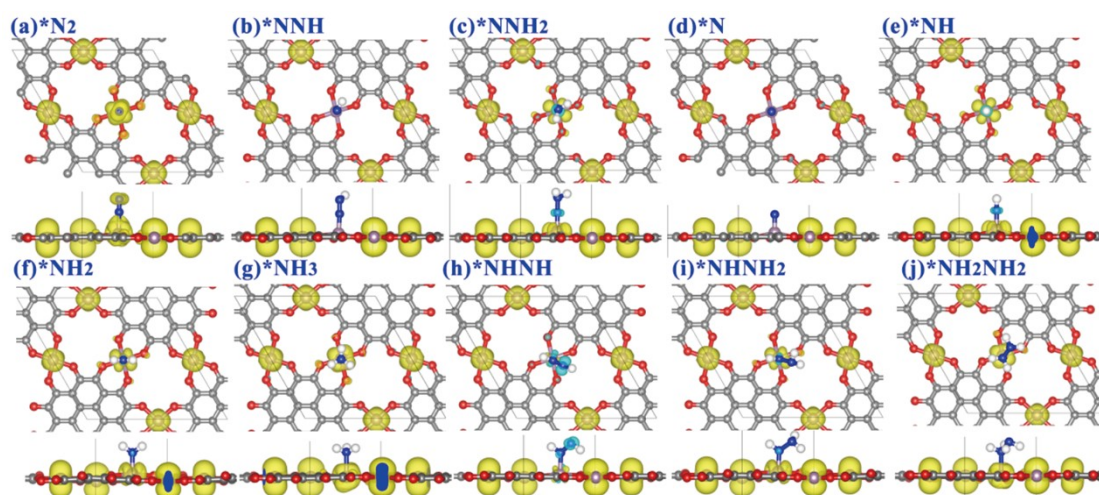

**Fig. S2.** The spin density of NRR species on Mo-O MOF monolayer. The isosurface value is  $0.005 \text{ e } \text{\AA}^{-3}$ .

## Supplementary Tables

**Table S1** Zero-point energy corrections ( $\Delta E_{\text{ZPE}}$ ) and entropic contributions (at 298.15 K) to the free energies of the adsorption species and molecules on TM-O MOF monolayer estimated from the vibrational frequencies, \* denotes TM-O MOF.

| Species                          | $\Delta E_{\text{ZPE}}$ | $T\Delta S$ |
|----------------------------------|-------------------------|-------------|
| *N <sub>2</sub>                  | 0.19                    | 0.16        |
| *NNH                             | 0.45                    | 0.15        |
| *NNH <sub>2</sub>                | 0.83                    | 0.17        |
| *NHNH                            | 0.81                    | 0.14        |
| *NHNH <sub>2</sub>               | 1.13                    | 0.17        |
| *NH <sub>2</sub> NH <sub>2</sub> | 1.42                    | 0.20        |
| *N                               | 0.09                    | 0.04        |
| *NH                              | 0.34                    | 0.09        |
| *NH <sub>2</sub>                 | 0.64                    | 0.14        |
| *NH <sub>3</sub>                 | 1.01                    | 0.11        |
| *H                               | 0.16                    | 0.02        |
| N <sub>2</sub>                   | 0.15                    | 0.59        |
| H <sub>2</sub>                   | 0.27                    | 0.41        |
| NH <sub>3</sub>                  | 0.58                    | 0.56        |

**Table S2** Calculated lattice constants ( $l_a$ ) for different TM-O MOF monolayers.

| Materials | Sc-   | Ti-   | V-    | Cr-          | Mn-   | Fe-   | Co-   | Ni-   | Cu-   | Zn-   |
|-----------|-------|-------|-------|--------------|-------|-------|-------|-------|-------|-------|
| $l_a$ (Å) | 12.83 | 12.58 | 12.48 | 12.50        | 12.39 | 12.31 | 12.26 | 12.26 | 12.48 | 12.63 |
| Materials | Y     | Zr    | Nb    | <b>Mo</b>    | Tc    | Ru    | Rh    | Pd    | Ag    | Cd    |
| $l_a$ (Å) | 13.18 | 12.87 | 12.73 | <b>12.67</b> | -     | 12.56 | 12.54 | 12.55 | 13.04 | 13.14 |
| Materials | La    | Hf    | Ta    | W            | Re    | Os    | Ir    | Pt    | Au    | Hg    |
| $l_a$ (Å) | -     | 12.83 | 12.70 | 12.59        | 12.65 | 12.55 | 12.52 | 12.52 | 12.53 | -     |

**Table S3** Calculated adsorption free energy [ $\Delta G(*N_2)$ ] of  $N_2$ , the distance between TM atom and  $N_2$  molecule ( $D_{TM-N}$ ), and N-N bond length ( $L_{N-N}$ ) for  $*N_2$ /TM-O MOF systems.

| Materials             |      | Sc-   | Ti-   | V-   | Cr-          | Mn-  | Fe-  | Co-  | Ni-  | Cu-  | Zn-  |
|-----------------------|------|-------|-------|------|--------------|------|------|------|------|------|------|
| $\Delta G(*N_2)$ (eV) | End  | -0.21 | -0.94 | 0.31 | 0.31         | 0.30 | 0.33 | 0.35 | 0.35 | 0.31 | 0.25 |
|                       | Side | -     | -     | 0.36 | 0.31         | 0.29 | 0.28 | 0.35 | 0.35 | 0.31 | 0.25 |
| $D_{TM-N}$ (Å)        | End  | 1.83  | 2.10  | 2.74 | 2.73         | 2.60 | 3.28 | 3.22 | 3.24 | 3.13 | 2.73 |
|                       | Side | -     | -     | 3.60 | 2.71         | 2.58 | 3.19 | 3.18 | 3.24 | 3.31 | 2.70 |
| $L_{N-N}$ (Å)         | End  | 1.14  | 1.12  | 1.11 | 1.11         | 1.11 | 1.11 | 1.11 | 1.11 | 1.11 | 1.11 |
|                       | Side | -     | -     | 1.11 | 1.11         | 1.11 | 1.11 | 1.11 | 1.11 | 1.11 | 1.11 |
| Materials             |      | Y     | Zr    | Nb   | <b>Mo</b>    | Tc   | Ru   | Rh   | Pd   | Ag   | Cd   |
| $\Delta G(*N_2)$ (eV) | End  | -0.15 | -0.99 | 0.33 | <b>-0.05</b> | -    | 0.14 | 0.36 | 0.35 | 0.28 | 0.25 |
|                       | Side | -     | -     | 0.34 | <b>0.50</b>  | -    | 0.36 | 0.36 | 0.35 | 0.25 | 0.25 |
| $D_{TM-N}$ (Å)        | End  | 2.51  | 2.25  | 2.77 | <b>1.91</b>  | -    | 3.41 | 3.32 | 3.78 | 3.09 | 2.89 |
|                       | Side | -     | -     | 2.78 | <b>2.07</b>  | -    | 3.41 | 3.86 | 3.33 | 3.42 | 2.85 |
| $L_{N-N}$ (Å)         | End  | 1.12  | 1.12  | 1.11 | <b>1.15</b>  | -    | 1.11 | 1.11 | 1.11 | 1.11 | 1.11 |
|                       | Side | -     | -     | 1.11 | <b>1.19</b>  | -    | 1.11 | 1.11 | 1.11 | 1.11 | 1.11 |
| Materials             |      | La    | Hf    | Ta   | W            | Re   | Os   | Ir   | Pt   | Au   | Hg   |
| $\Delta G(*N_2)$ (eV) | End  | -     | -0.98 | 0.38 | 0.32         | 0.33 | 0.33 | 0.36 | 0.35 | 0.22 | -    |
|                       | Side | -     | -0.83 | 0.34 | 0.38         | 0.67 | 0.34 | 0.36 | 0.35 | 0.22 | -    |
| $D_{TM-N}$ (Å)        | End  | -     | 2.18  | 3.64 | 3.30         | 2.72 | 3.61 | 3.51 | 3.49 | 3.35 | -    |
|                       | Side | -     | 2.34  | 4.05 | 3.73         | 2.94 | 3.58 | 3.52 | 3.45 | 3.62 | -    |
| $L_{N-N}$ (Å)         | End  | -     | 1.12  | 1.11 | 1.11         | 1.11 | 1.11 | 1.11 | 1.11 | 1.11 | -    |
|                       | Side | -     | 1.15  | 1.11 | 1.11         | 1.11 | 1.11 | 1.11 | 1.11 | 1.11 | -    |

**Table S4** Calculated adsorption free energy [ $\Delta G(*NNH)$ ] of  $NNH$ , the distance between TM atom and  $N_2$  molecule ( $D_{TM-N}$ ), and N-N bond length ( $L_{N-N}$ ) for  $NNH$ /TM-O MOF systems.

| Materials             |      | Sc-  | Ti-  | Y-   | Zr-  | <b>Mo-</b>  | Hf-  |
|-----------------------|------|------|------|------|------|-------------|------|
| $\Delta G(*NNH)$ (eV) | End  | 1.71 | 1.49 | 1.74 | 1.39 | <b>0.27</b> | 0.98 |
|                       | Side | -    | -    | -    | -    | -           | 0.59 |
| $D_{TM-N}$ (Å)        | End  | 2.11 | 1.87 | 2.26 | 2.03 | <b>1.75</b> | 2.01 |
|                       | Side | -    | -    | -    | -    | -           | 2.15 |
| $L_{N-N}$ (Å)         | End  | 1.19 | 1.21 | 1.20 | 1.22 | <b>1.24</b> | 1.22 |
|                       | Side | -    | -    | -    | -    | -           | 1.24 |

**Table S5** Calculated N-N bond length ( $L_{N-N}$ , Å), the distance between TM atom and adsorbed intermediates ( $D_{TM-N}$ , Å). Charge analysis of Mo atoms ( $Q_{Mo}$ ,  $e$ ), O atoms ( $Q_{O_4}$ ,  $e$ ), graphene linkers ( $Q_{graphene}$ ,  $e$ ) and adsorbed intermediates ( $Q_{ads}$ ,  $e$ ) for the adsorbed systems. The total magnetic moment  $M_T(\mu_B)$  of the adsorbed systems. The positive and negative numbers represent electrons gained and lost, respectively.

| Systems                                      | $L_{N-N}$<br>(Å) | $D_{Mo-N}$<br>(Å) | $Q_{Mo}$<br>( $e$ ) | $Q_{O_4}$<br>( $e$ ) | $Q_{graphene}$<br>( $e$ ) | $Q_{ads}$<br>( $e$ ) | $M_T(\mu_B)$ |
|----------------------------------------------|------------------|-------------------|---------------------|----------------------|---------------------------|----------------------|--------------|
| Mo-O MOF                                     | -                | -                 | -2.02               | +4.68                | -2.66                     | -                    | 6.00         |
| N <sub>2</sub> /Mo-O MOF                     | 1.15             | 1.91              | -2.19               | +6.18                | -4.35                     | +0.36                | 5.68         |
| NNH/Mo-O MOF                                 | 1.24             | 1.75              | -2.35               | +6.14                | -4.30                     | +0.51                | 3.41         |
| NNH <sub>2</sub> /Mo-O MOF                   | 1.33             | 1.72              | -2.04               | +6.24                | -4.66                     | +0.46                | 4.00         |
| N...NH <sub>3</sub> /Mo-O MOF                | 3.32             | -                 | -                   | -                    | -                         | -                    | 3.00         |
| N/Mo-O MOF                                   | -                | 1.64              | -2.44               | +6.22                | -4.54                     | +0.76                | 3.00         |
| NH/Mo-O MOF                                  | -                | 1.70              | -2.34               | +6.28                | -4.51                     | +0.57                | 4.00         |
| NH <sub>2</sub> /Mo-O MOF                    | -                | 1.90              | -2.29               | +6.11                | -4.14                     | +0.32                | 5.00         |
| NH <sub>3</sub> /Mo-O MOF                    | -                | 2.17              | -2.26               | +2.87                | -0.46                     | -0.15                | 6.00         |
| NHNH/Mo-O MOF                                | 1.29             | 1.93              | -2.24               | +6.09                | -4.16                     | +0.31                | 3.63         |
| NHNH <sub>2</sub> /Mo-O MOF                  | 1.41             | 1.89              | -2.32               | +4.54                | -2.46                     | +0.24                | 5.00         |
| NH <sub>2</sub> NH <sub>2</sub> /Mo-O MOF    | 1.46             | 2.14              | -2.13               | +4.60                | -2.29                     | -0.18                | 6.00         |
| NH <sub>2</sub> ...NH <sub>3</sub> /Mo-O MOF | 3.63             | -                 | -                   | -                    | -                         | -                    | 5.00         |

**Table S6** The calculated limiting potentials ( $U_L$  in V) and PLS for the different catalysts that have been synthesized or designed recently.

| Systems                              | Pathway             | PLS                                                                   | $U_L$ (V)    | References                        |
|--------------------------------------|---------------------|-----------------------------------------------------------------------|--------------|-----------------------------------|
| <b>Mo-O MOF</b>                      | <b>Distal</b>       | <b>*NH<sub>2</sub>+H<sup>+</sup>+e<sup>-</sup>→*NH<sub>3</sub></b>    | <b>-0.36</b> | <b>The present work</b>           |
| V@GDY                                | Distal/ Alternating | *N <sub>2</sub> +H <sup>+</sup> +e <sup>-</sup> →*NNH                 | -0.67        | Feng et al. 2020 <sup>3</sup>     |
| Ru <sub>1</sub> -N <sub>3</sub>      | Distal              | *N <sub>2</sub> +H <sup>+</sup> +e <sup>-</sup> →*NNH                 | -0.73        | Li et al. 2018 <sup>4</sup>       |
| Ru <sub>1</sub> -N <sub>4</sub>      | Distal              | *N <sub>2</sub> +H <sup>+</sup> +e <sup>-</sup> →*NNH                 | -0.77        | Li et al. 2018 <sup>4</sup>       |
| Defect-rich MoS <sub>2</sub>         | Distal              | *NH <sub>2</sub> +H <sup>+</sup> +e <sup>-</sup> →*NH <sub>3</sub>    | -0.60        | Li et al. 2018 <sup>5</sup>       |
| MoS <sub>2</sub> with Mo edge        | Distal              | *N <sub>2</sub> +H <sup>+</sup> +e <sup>-</sup> →*NNH                 | -0.68        | Zhang et al. 2018 <sup>6</sup>    |
| Mo <sub>2</sub> C (111)              | Distal              | *N <sub>2</sub> +H <sup>+</sup> +e <sup>-</sup> →*NNH                 | -0.74        | Ren et al. 2019 <sup>7</sup>      |
| Mo <sub>2</sub> C (002)              | Distal              | *NH <sub>2</sub> +H <sup>+</sup> +e <sup>-</sup> →*NH <sub>3</sub>    | -0.92        | Chen et al. 2018 <sup>8</sup>     |
| Ru(0001)                             | Distal              | *N <sub>2</sub> +H <sup>+</sup> +e <sup>-</sup> →*NNH                 | -0.94        | Skulason et al. 2012 <sup>9</sup> |
| Co <sub>2</sub> @GDY                 | Distal              | *NH <sub>2</sub> +H <sup>+</sup> +e <sup>-</sup> →*NH <sub>3</sub>    | -0.43        | Ma et al. 2019 <sup>10</sup>      |
| Nb <sub>2</sub> O <sub>5</sub> (181) | Distal              | *NNH <sub>2</sub> +H <sup>+</sup> +e <sup>-</sup> →*N+NH <sub>3</sub> | -0.56        | Han et al. 2018 <sup>11</sup>     |
| Ru <sub>1</sub> @C <sub>2</sub> N    | Distal/ Alternating | *N <sub>2</sub> +H <sup>+</sup> +e <sup>-</sup> →*NNH                 | -0.96        | Cao et al. 2018 <sup>12</sup>     |
| Mo-embedded BN monolayer             | Enzymatic           | *NH <sub>2</sub> +H <sup>+</sup> +e <sup>-</sup> →*NH <sub>3</sub>    | -0.35        | Zhao et al. 2017 <sup>13</sup>    |
| Mo@g-CN                              | Distal              | *N <sub>2</sub> +H <sup>+</sup> +e <sup>-</sup> →*NNH                 | -0.39        | Guo et al. 2020 <sup>14</sup>     |
| Mo <sup>0</sup> /GDY                 | Alternating         | *NHNH+H <sup>+</sup> +e <sup>-</sup> →*NHNH <sub>2</sub>              | -0.71        | Hui et al. 2019 <sup>15</sup>     |
| CrN <sub>2</sub> B <sub>2</sub>      | Enzymatic           | *N <sub>2</sub> +H <sup>+</sup> +e <sup>-</sup> →*NNH                 | -0.33        | Fang et al. 2021 <sup>16</sup>    |
| NiCo@GDY                             | Distal              | *N <sub>2</sub> +H <sup>+</sup> +e <sup>-</sup> →*NNH                 | -0.36        | Ma et al. 2021 <sup>17</sup>      |
| Rh SA/GDY                            | Enzymatic           | *N <sub>2</sub> +H <sup>+</sup> +e <sup>-</sup> →*NNH                 | -0.44        | Zou et al. 2021 <sup>18</sup>     |
| Pd-GDY                               | Distal              | *N <sub>2</sub> +H <sup>+</sup> +e <sup>-</sup> →*NNH                 | -0.21        | Yu et al. 2021 <sup>19</sup>      |
| Pt-3O structure                      | Distal              | *N <sub>2</sub> +H <sup>+</sup> +e <sup>-</sup> →*NNH                 | -0.78        | Hao et al. 2020 <sup>20</sup>     |

## References

- 1 J. K. Nørskov, J. Rossmeisl, A. Logadottir, et al. Origin of the overpotential for oxygen reduction at a fuel-cell cathode, *Journal of Physical Chemistry B*, 2004, 108, 17886-17892.
- 2 NIST Chemistry WebBook, <https://webbook.nist.gov/chemistry/>. accessed Feb 9, 2018.
- 3 Zhen Feng, Yanan Tang, Weiguang Chen, et al. Graphdiyne coordinated transition metals as single-atom catalysts for nitrogen fixation, *Physical Chemistry Chemical Physics*, 2020, 22, 9216-9224.
- 4 Zhigang Geng, Yan Liu, Xiangdong Kong, et al. Achieving a record-high yield rate of  $120.9 \mu\text{g NH}_3 \text{ mg cat.}^{-1} \text{ h}^{-1}$  for  $\text{N}_2$  electrochemical reduction over Ru single-atom catalysts. *Advanced Materials*, 2018, 30(40), 1803498.
- 5 Xianghong Li, Tingshuai Li, Yongjun Ma, et al. Boosted electrocatalytic  $\text{N}_2$  reduction to  $\text{NH}_3$  by defect-rich  $\text{MoS}_2$  nanoflower. *Advanced Energy Materials*, 2018, 8(30), 1801357.
- 6 Ling Zhang, Xuqiang Ji, Xiang Ren, et al. Electrochemical ammonia synthesis via nitrogen reduction reaction on a  $\text{MoS}_2$  catalyst: Theoretical and experimental studies. *Advanced Materials*, 2018, 30(28), 1800191.
- 7 Xiang Ren, Jinxiu Zhao, Qin Wei, et al. High-performance  $\text{N}_2$ -to- $\text{NH}_3$  conversion electrocatalyzed by  $\text{Mo}_2\text{C}$  nanorod. *ACS Central Science*, 2019, 5(1), 116-121.
- 8 Hui Cheng, Liang-Xin Ding, Gao-Feng Chen, et al. Molybdenum carbide nanodots enable efficient electrocatalytic nitrogen fixation under ambient conditions. *Advanced Materials*, 2018, 30(46), 1803694.
- 9 Egill Skúlason, Bligaard Thomas, Gudmundsdóttir Sigrídur, et al. A theoretical evaluation of possible transition metal electro-catalysts for  $\text{N}_2$  reduction. *Physical Chemistry Chemical Physics*, 2012, 14(3), 1235-1245.
- 10 Dongwei Ma, Zaiping Zeng, Liangliang Liu, et al. Computational evaluation of electrocatalytic nitrogen reduction on TM single-, double-, and triple-atom catalysts



(TM = Mn, Fe, Co, Ni) based on graphdiyne monolayers. *The Journal of Physical Chemistry C*, 2019, 123(31), 19066-19076.

11 Jingrui Han, Zaichun Liu, Yongjun Ma, et al. Ambient N<sub>2</sub> fixation to NH<sub>3</sub> at ambient conditions: Using Nb<sub>2</sub>O<sub>5</sub> nanofiber as a high-performance electrocatalyst. *Nano Energy*, 2018, 52, 52264-270.

12 Yongyong Cao, Yijing Gao, Hu Zhou, et al. Highly efficient ammonia synthesis electrocatalyst: Single Ru atom on naturally nanoporous carbon materials. *Advanced Theory and Simulations*, 2018, 18000181-10.

13 Jingxiang Zhao, Zhongfang Chen. Single Mo atom supported on defective boron nitride monolayer as an efficient electrocatalyst for nitrogen fixation: A computational study. *Journal of the American Chemical Society*, 2017, 139(36), 12480-12487.

14 Huan Niu, Xiting Wang, Chen Shao, et al. Computational Screening Single-Atom Catalysts Supported on g-CN for N<sub>2</sub> Reduction: High Activity and Selectivity, *ACS Sustainable Chemistry & Engineering*, 2020, 8, 13749-13758.

15 Lan Hui, Yurui Xue, Huidi Yu, et al. Highly efficient and selective generation of ammonia and hydrogen on a graphdiyne-based catalyst. *Journal of the American Chemical Society*, 2019, 141(27), 10677-10683.

16 Cong Fang, Wei An. Single-metal-atom site with high-spin state embedded in defective BN nanosheet promotes electrocatalytic nitrogen reduction, *Nano Research*, 2021, 14, 4211-4219.

17 Dongwei Ma, Zaiping Zeng, Liangliang Liu, et al. Theoretical screening of the transition metal heteronuclear dimer anchored graphdiyne for electrocatalytic nitrogen reduction, *Journal of Energy Chemistry*, 2021, 54, 501-509.

18 Haiyuan Zou, Weifeng Rong, Shuting Wei, et al. Regulating kinetics and thermodynamics of electrochemical nitrogen reduction with metal single-atom catalysts in a pressurized electrolyser, *PNAS*, 2020, 117 (47), 29462-29468.

19 Huidi Yu, Yurui Xue, Lan Hui, et al. Graphdiyne-based metal atomic catalysts for synthesizing ammonia, *National Science Review*, 2021, 8(8), nwaa213.

20 Ran Hao, Wenming Sun, Qian Liu, et al. Efficient Electrochemical Nitrogen Fixation over Isolated Pt Sites, *Small*, 2020, 2000015.
